# Supplementary material for: Wnt-C59 inhibits proinflammatory cytokine expression by reducing the interaction between β-catenin and NF-κB in LPS-stimulated epithelial and macrophage cells
Source: PubMed Central journal article supplement — Korean J Physiol Pharmacol. 2021 Jul 1;25(4):307–19. doi: 10.4196/kjpp.2021.25.4.307 (PMC8255128; doi:10.4196/kjpp.2021.25.4.307), 2021-07-01
Supplement: kjpp-25-4-307-supple.pdf [file kjpp-25-4-307-supple.pdf]

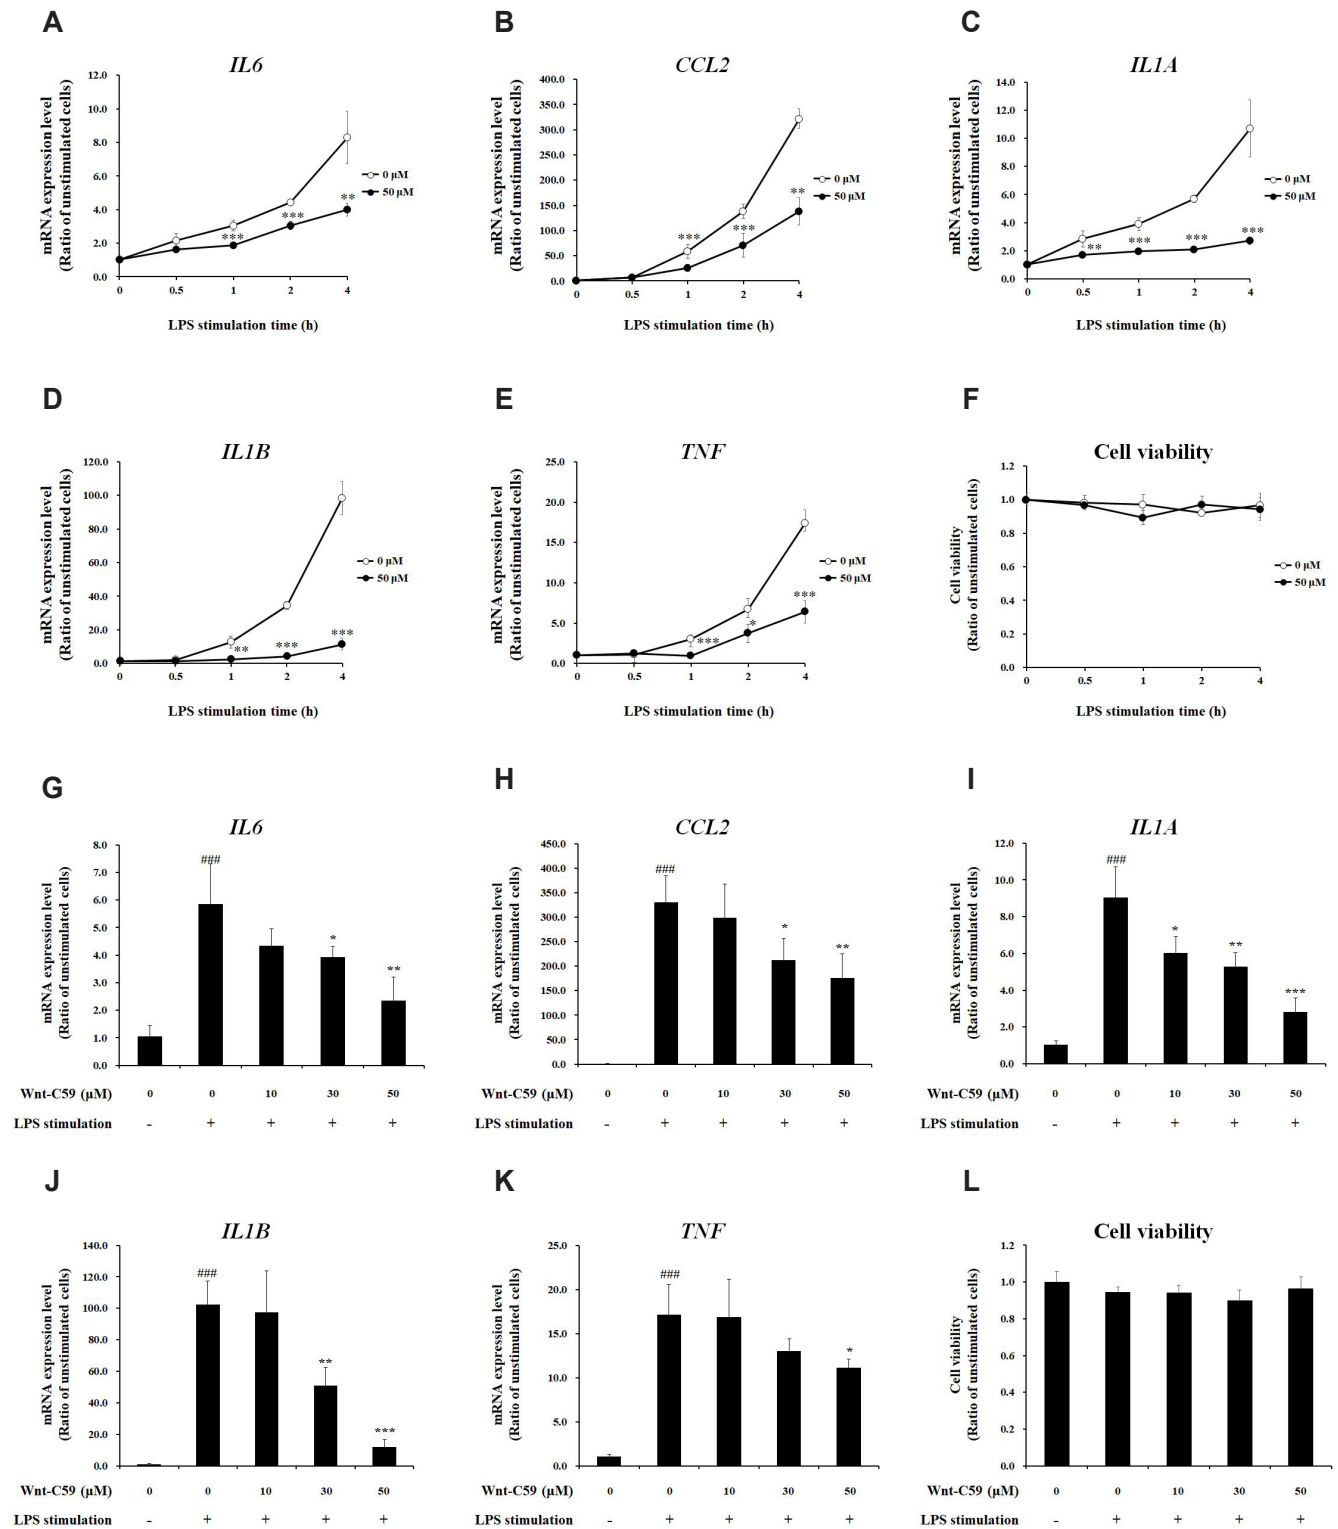

**Supplementary Data 1. Suppressive effect of Wnt-C59 on lipopolysaccharide (LPS)-induced proinflammatory cytokine expression in human umbilical vein endothelial cells.** (A–F) Cells were treated with 0 or 50 μM of Wnt-C59, followed by stimulation with 0.1 μg/ml of LPS for various time periods of 0.5 to 4 h. (A–E) Messenger RNA levels of proinflammatory cytokines were measured by RT-qPCR. (F) Cell viability was measured. Cells treated with 0 or 50 μM of Wnt-C59 with the same duration of LPS stimulation were compared. \*\*p < 0.01, \*\*\*p < 0.001. (G–L) Cells were treated with 0 to 50 μM of Wnt-C59, followed by stimulation with 0.1 μg/ml of LPS for 4 h. (G–K) Messenger RNA levels of proinflammatory cytokines were measured by RT-qPCR. (L) Cell viability was measured. \*p < 0.05, \*\*p < 0.01, \*\*\*p < 0.001 compared with cells stimulated with LPS with 0 μM of Wnt-C59. ###p < 0.001 compared with unstimulated cells. Experiments were conducted in triplicate. Data are shown as mean ± standard deviation, and statistical significance was measured by unpaired t-test.

**A**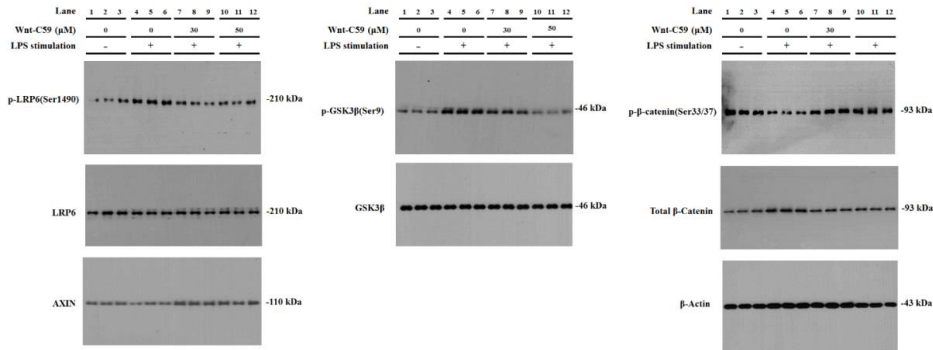**B**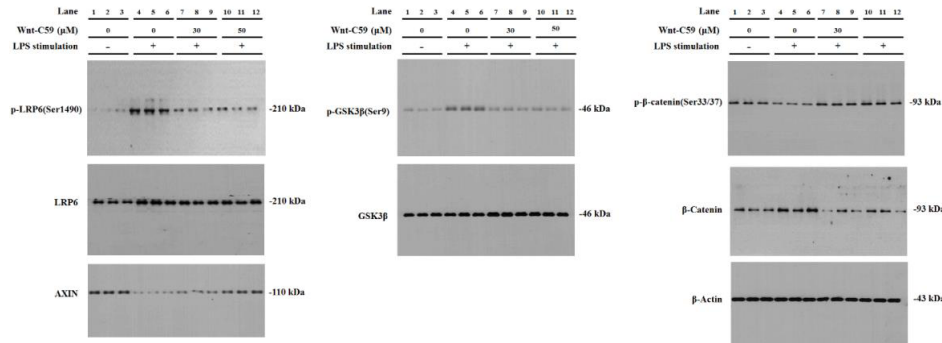**C**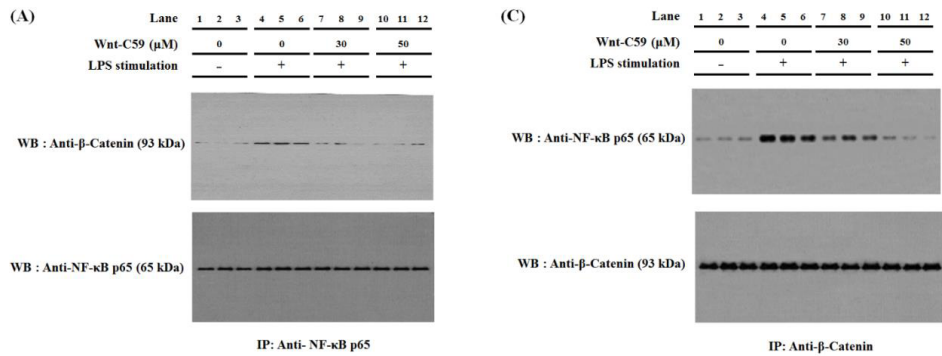**D**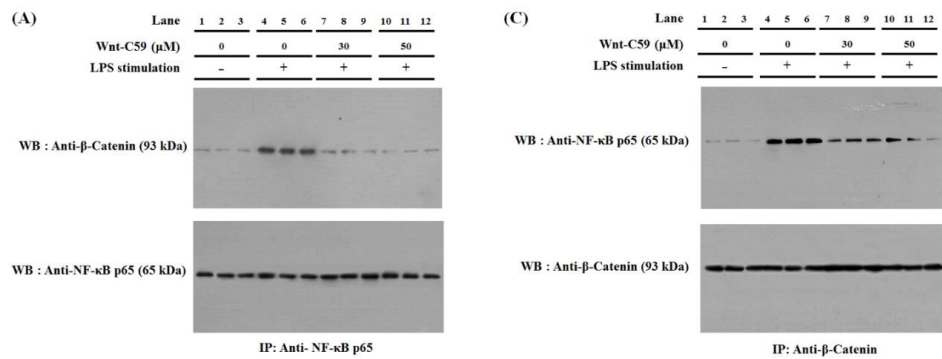

**Supplementary Data 2. Original uncut Western blot images.** (A) Original image of Fig. 3A. (B) Original image of Fig. 4A. (C) Original image of Fig. 7A and 7C. (D) Original image of Fig. 8A and 8C.

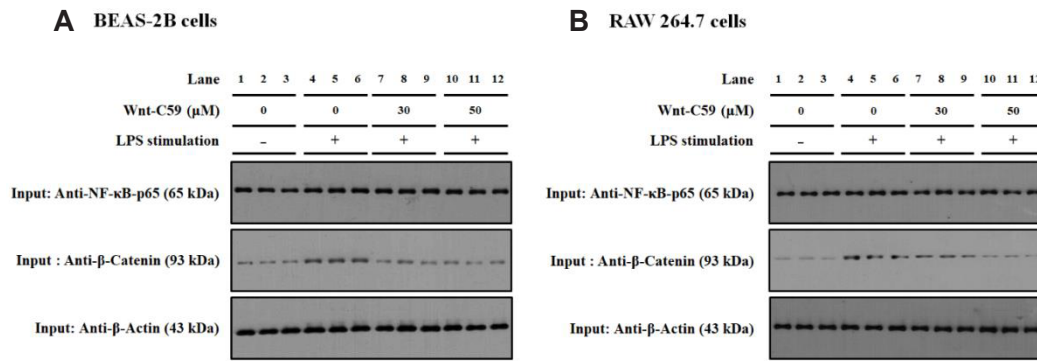

**Supplementary Data 3. Input samples of co-immunoprecipitation experiments.** Input samples of the co-immunoprecipitation experiments of Fig. 7A–D and Fig. 8A–D were analyzed by Western blotting with anti-NF- $\kappa$ B p65 and anti- $\beta$ -catenin antibody.  $\beta$ -Actin was used as an equal loading control. The total amount of NF- $\kappa$ B showed no variation and the amount of  $\beta$ -catenin showed same patterns with Figs. 3F and 4F.
